# Supplementary material
Source: publisher site journal article supplement (https://www.spandidos-publications.com/691/downloadSupplementary)

Figure S1. NRK-52E cell treated with different foscinopril concentrations under normal (5 mM) glucose and high (30 mM) glucose media for 48 h. At the end of each time point, cell proliferation was determined by MTT assay. Data are presented as the mean  $\pm$  SD (n=6). \*P<0.05 and \*\*P<0.01 vs. 0 mg/l FP under normal or high glucose conditions. OD, optical density.

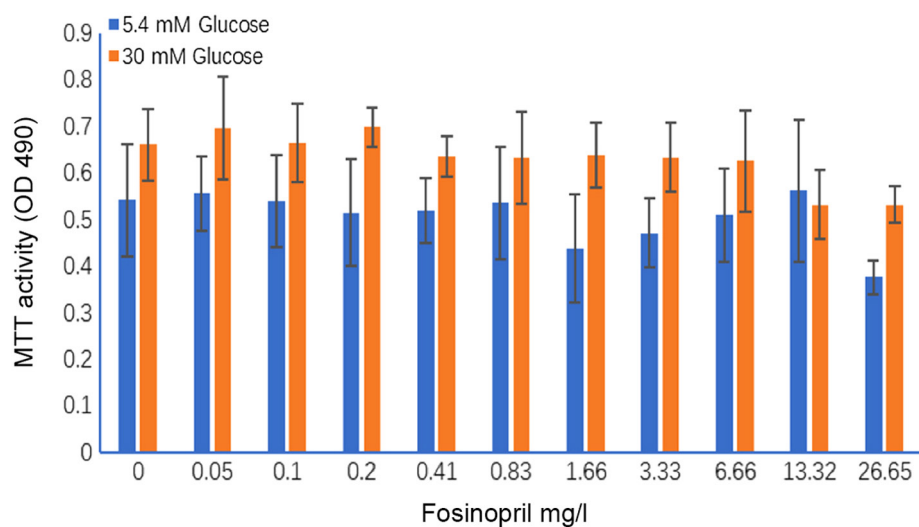

Figure S2. Representative images of renal kidney injury molecule-1 immunohistological staining from (A) LETO, (B) OLETF and (C) OLETF rats treated with FP at 56 weeks. LETO, Long-Evans Tokushima Otsuka; OLETF, Otsuka Long-Evans Tokushima Fatty; FP, fosinopril.

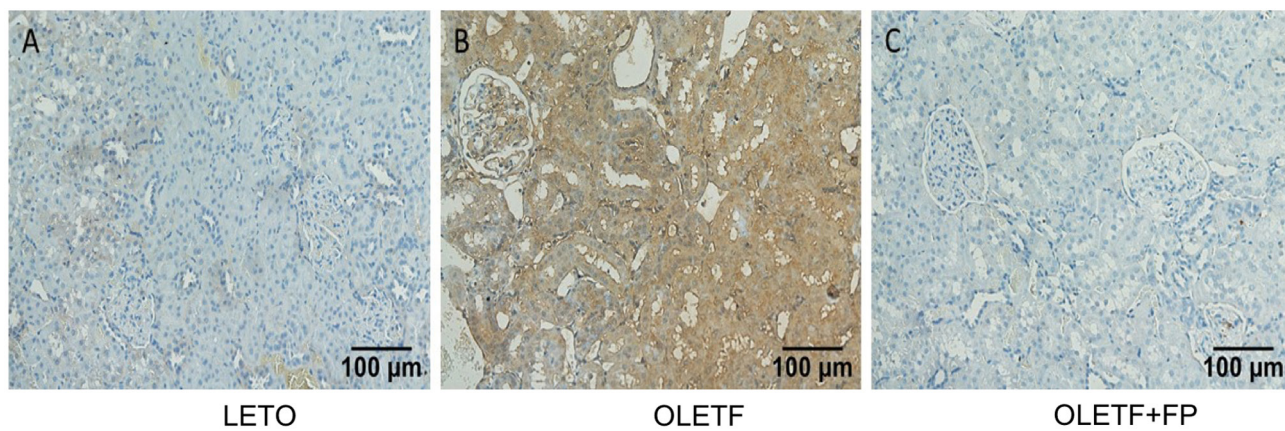

Supplement: Supplementary file 1 [file downloadSupplementary]
